# Supplementary material for: A Study of Possible Correlations between Seismo-Ionospheric Anomalies of GNSS Total Electron Content and Earthquake Energy
Source: MDPI journal article supplement (doi:10.3390/rs14051155), 2022-02-26
Supplement: s1 [file s1]

## Supplementary Material S1

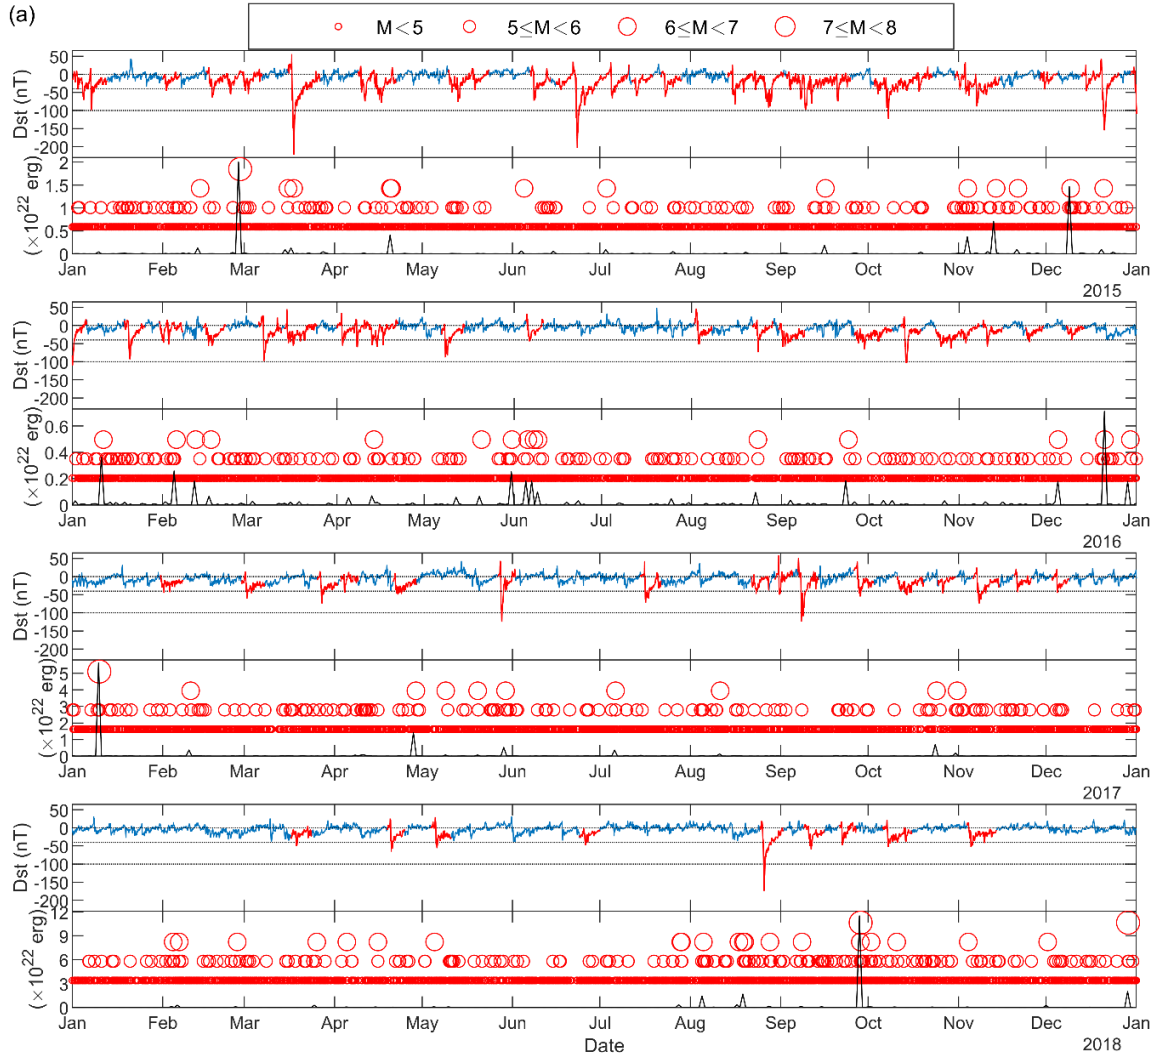

**Figure S1.** Dst variations (blue curve), temporal distributions of earthquake events (red cycle) and variations in daily total seismic wave energy release (black curve) during 2015–2018 for earthquakes and energy releases within (a) 110–130 °E, (b) Region A, (c) Region B, and (d) Region C. The red Dst curve denotes the periods in which the daily occurrence times of TEC anomalies were not considered in the analyses. The different sizes of cycles represent earthquakes of different magnitude ranges. The three black dashed lines denote Dst = 0, –40, and –100 nT.

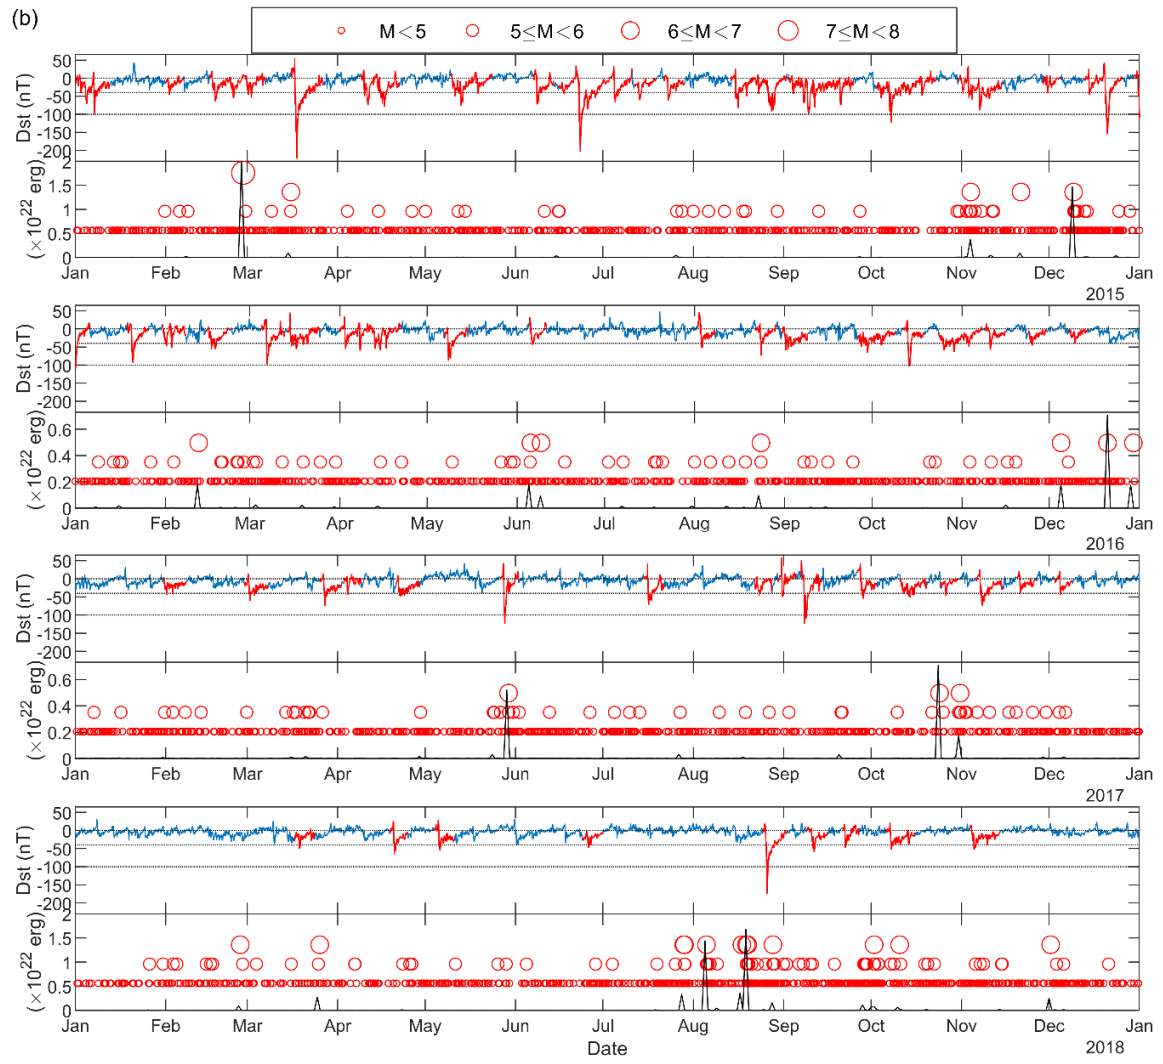

Figure S1. (continued)

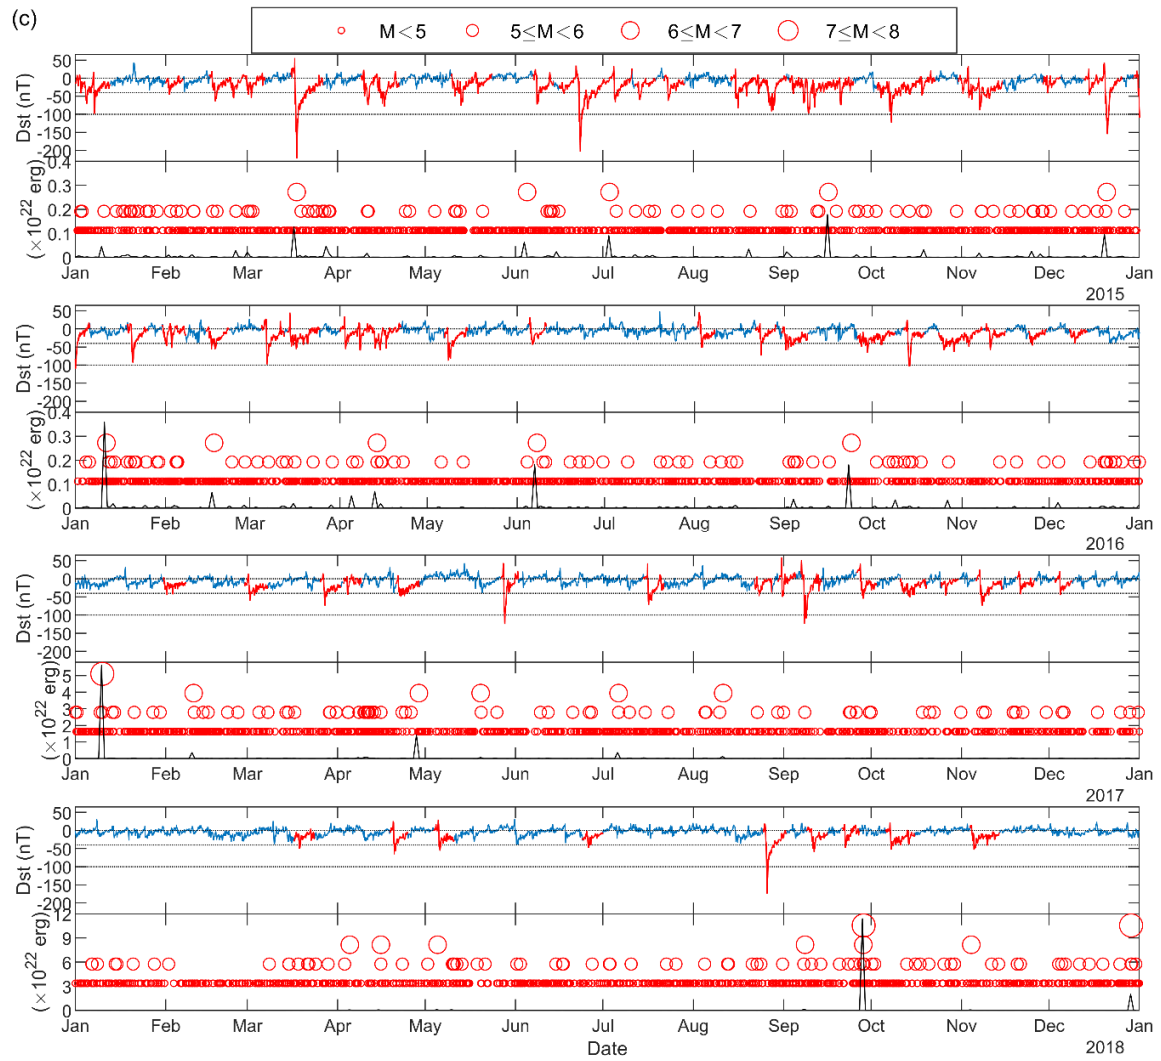

Figure S1. (continued)

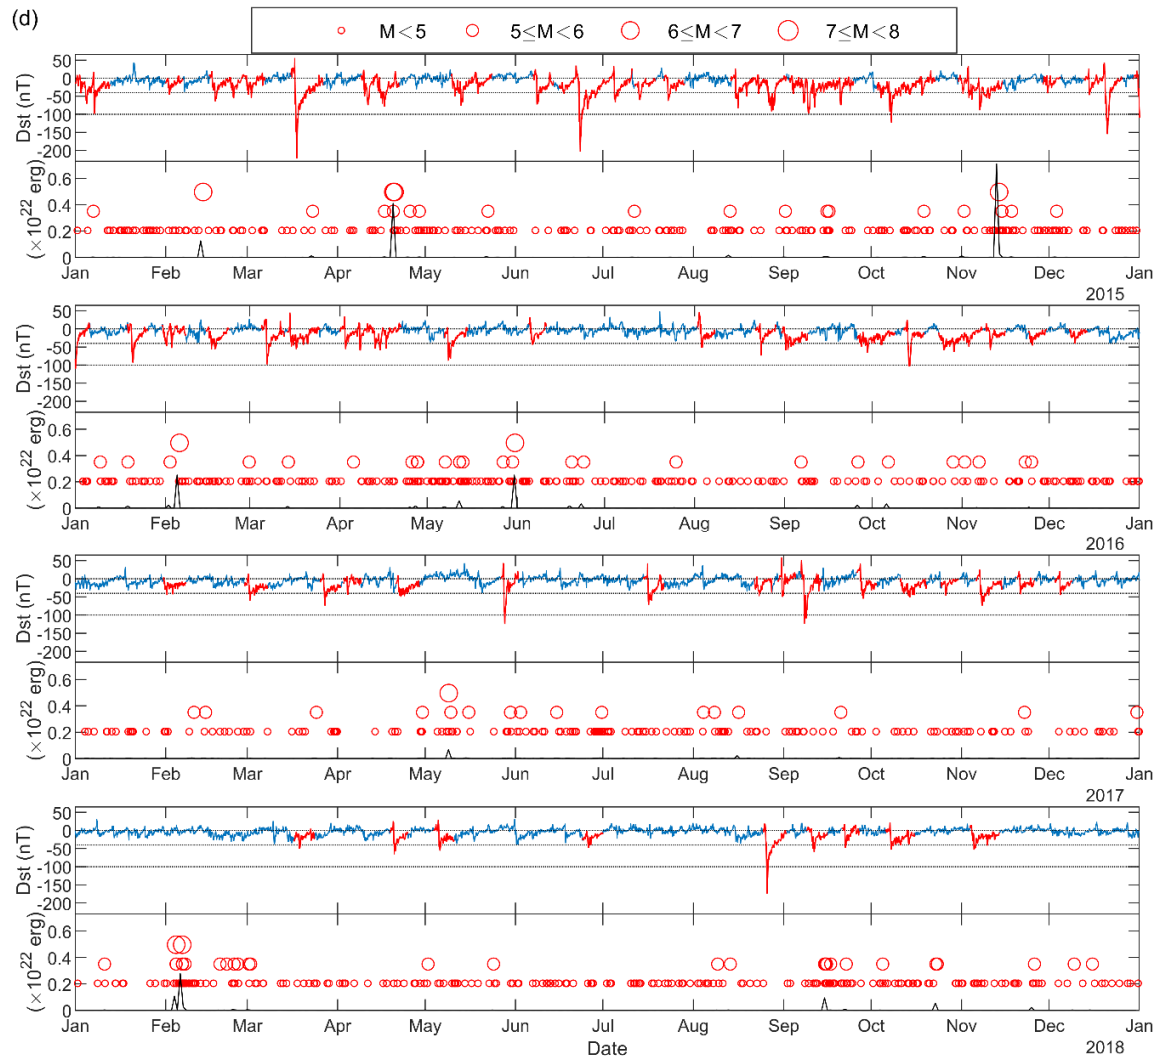

**Figure S1.** (continued)
